# Supplementary material for: Exposure to ionizing radiation disrupts normal epigenetic aging in Japanese medaka
Source: publisher site journal article supplement (doi:10.18632/aging.203624), 2021-10-13
Supplement: Supplementary file [file aging-v13i19-203624-supplementary-material-SD1.pdf]

## SUPPLEMENTARY FIGURES

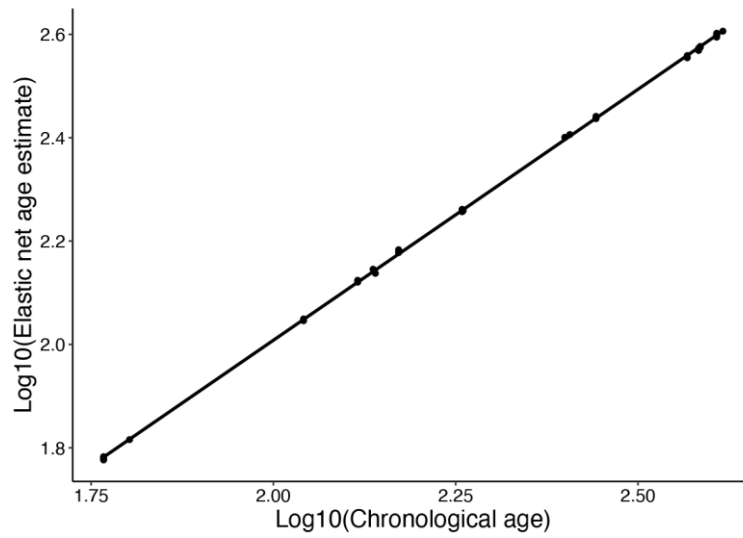

**Supplementary Figure 1. Performance of the elastic net based epigenetic age predictor on the training set (n=37).**  $R^2=0.99$ , MAE=3.9 days.

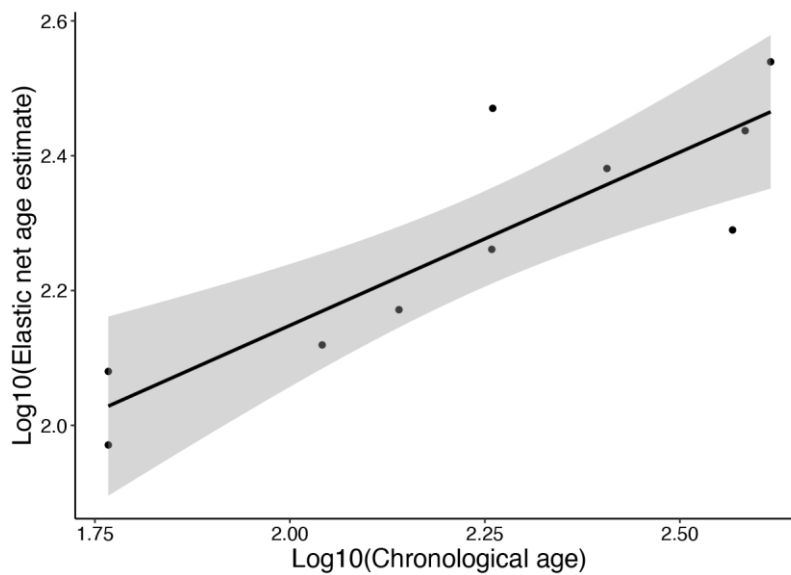

**Supplementary Figure 2. Performance of the elastic net based epigenetic age predictor on the test set (n = 10).**  $R^2 = 0.76$ , MAE = 60.9 days.

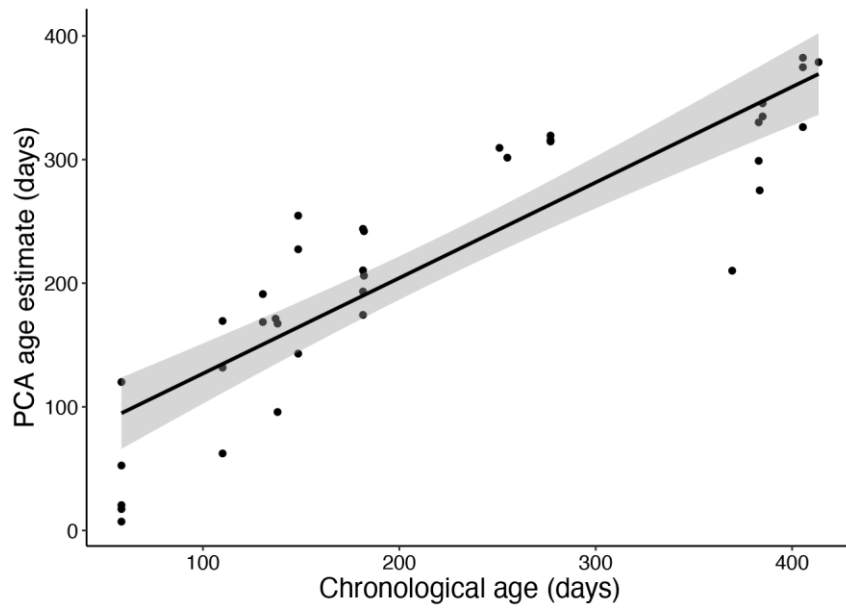

**Supplementary Figure 3. Performance of the PCA based epigenetic age predictor on the training set (n = 37).**  $R^2 = 0.77$ , MAE = 48.7 days.

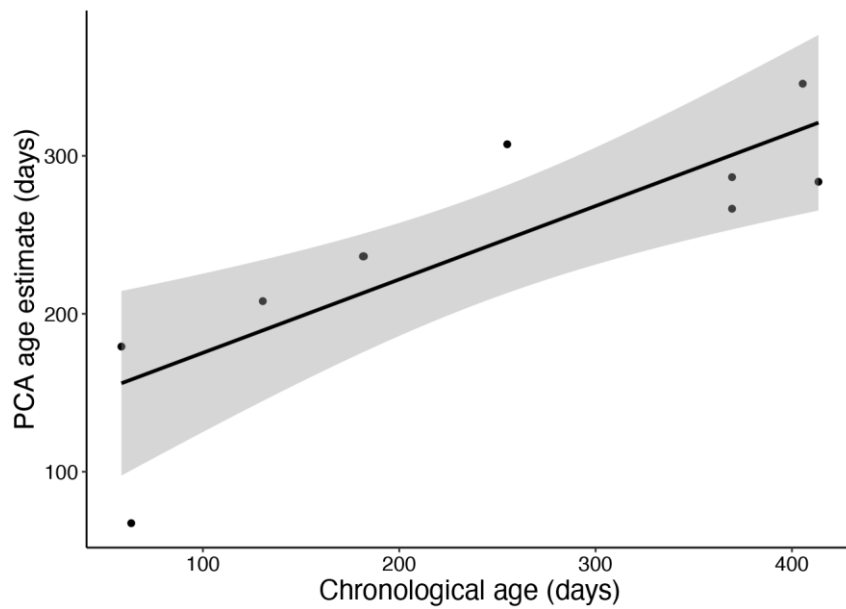

**Supplementary Figure 4. Performance of the PCA based epigenetic age predictor on the test set (n = 10).**  $R^2 = 0.64$ , MAE = 73.9 days.
