# Supplementary material for: Exposure to ionizing radiation disrupts normal epigenetic aging in Japanese medaka
Source: Aging (Albany NY). 2021 Oct 13;13(19):22752–71. doi: 10.18632/aging.203624 (PMC8544305; doi:10.18632/aging.203624)
Supplement: Supplementary Table 1 [file aging-13-203624-s002.pdf]

SUPPLEMENTARY TABLE

Supplementary Table 1. Comparison of overfit of epigenetic clock building approaches.

| Clock building approach | Number of CpGs included | Training set MAE | Training set R <sup>2</sup> | Test set MAE | Test set R <sup>2</sup> | Overfit? (t-test p-value) |
|-------------------------|-------------------------|------------------|-----------------------------|--------------|-------------------------|---------------------------|
| Elastic net             | 52                      | 3.9              | 0.99                        | 60.9         | 0.76                    | Yes (0.011)               |
| Linear model            | 10                      | 32.6             | 0.89                        | 61.1         | 0.72                    | Yes (0.021)               |
| PCA                     | 304                     | 48.7             | 0.77                        | 73.9         | 0.64                    | No (0.072)                |
